# Supplementary material for: Convenient preparation of CsSnI3 quantum dots, excellent stability, and the highest performance of lead-free inorganic perovskite solar cells so far
Source: Royal Society of Chemistry journal article supplement (doi:10.1039/c8ta10901j), 2019-01-01
Supplement: c8ta10901j1.pdf [file c8ta10901j1.pdf]

# **Convenient Preparation of CsSnI<sub>3</sub> Quantum Dots, Excellent Stability, and the Highest Performance of Lead-Free Inorganic Perovskite Solar Cells So Far**

Yangyang Wang<sup>a</sup>, Jin Tu<sup>b</sup>, Tianhao Li<sup>a</sup>, Cheng Tao<sup>a</sup>, Xianyu Deng<sup>a\*</sup> and Zhen Li<sup>b, c\*</sup>

<sup>a</sup> Shenzhen Key Laboratory of Advanced Materials, School of Materials Science and Engineering, Harbin Institute of Technology, Shenzhen, 518055, China. Email: [xydeng@hit.edu.cn](mailto:xydeng@hit.edu.cn)

<sup>b</sup> Department of Chemistry, Wuhan University, Wuhan 430072, China. Email: [lizhen@whu.edu.cn](mailto:lizhen@whu.edu.cn)

<sup>c</sup> Institute of Molecular Aggregation Science, Tianjin University, Tianjin 30072, China

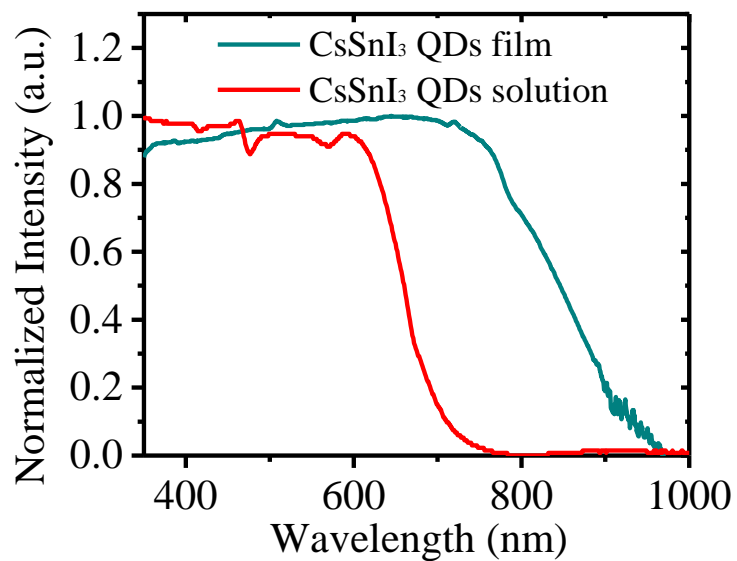

**Fig. S1.** UV-Vis absorption spectra of the CsSnI<sub>3</sub> QDs film and CsSnI<sub>3</sub> QDs solution with 4 vol% ASA after a heat treatment.

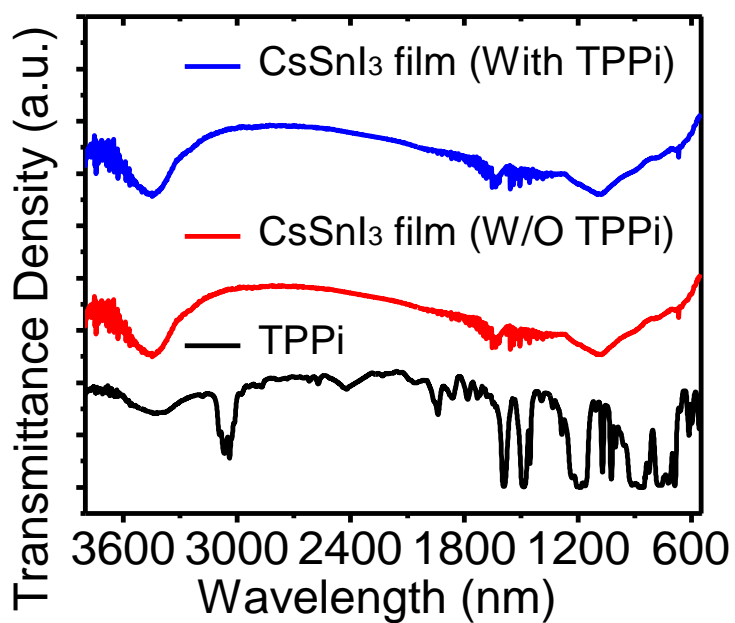

**Fig. S2.** IR Spectrum of the CsSnI<sub>3</sub> QDs film from the solution with and without TPPi

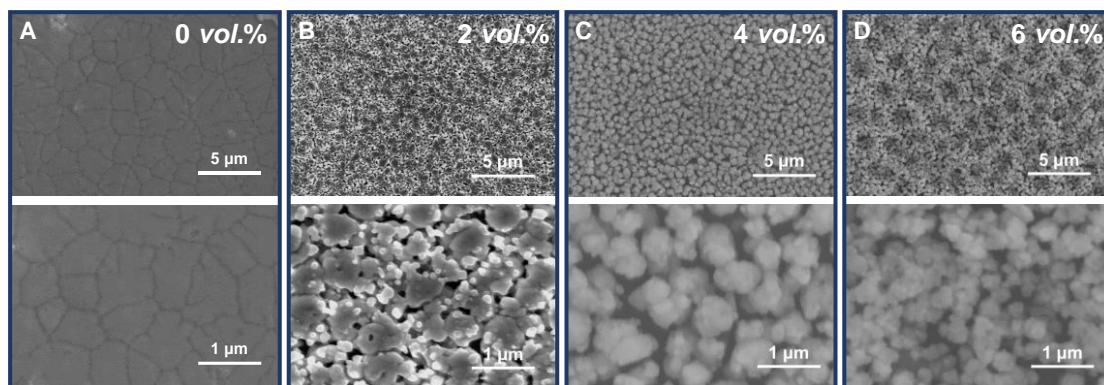

**Fig. S3.** The SEM images of the CsSnI<sub>3</sub> films prepared by a spin-coating method from the solution III with different ASA concentrations: (a) 0 vol.%, (b) 2 vol.%, (c) 4 vol.% and (d) 6 vol.%.

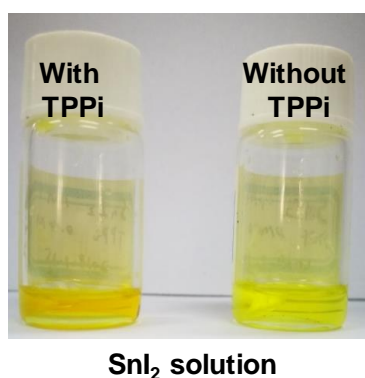

**Fig. S4.** Images of the SnI<sub>2</sub> solution with or without TPPi dissolved in the DMF:DMSO solvent mixture solvent. The concentration of SnI<sub>2</sub> and TPPi were 0.5 M and 4 vol.%, respectively.

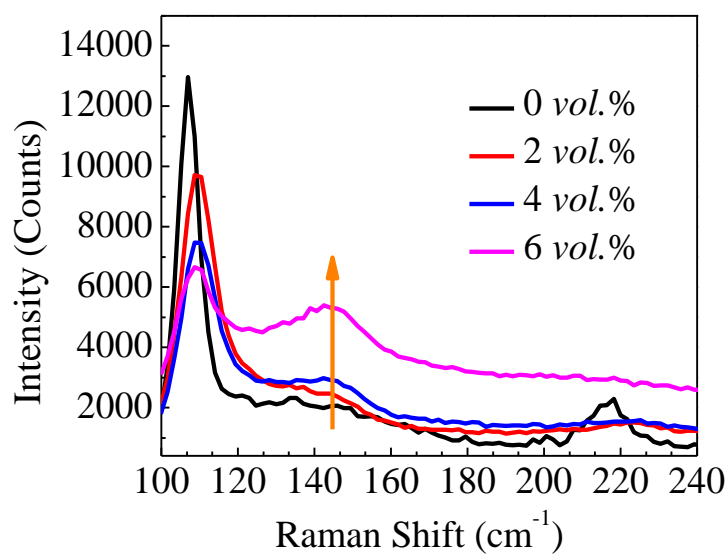

**Fig. S5.** Raman spectra of CsSnI<sub>3</sub> solutions containing different TPPi concentrations: 0 vol.%, 2 vol.%, 4 vol.% and 6 vol.%.

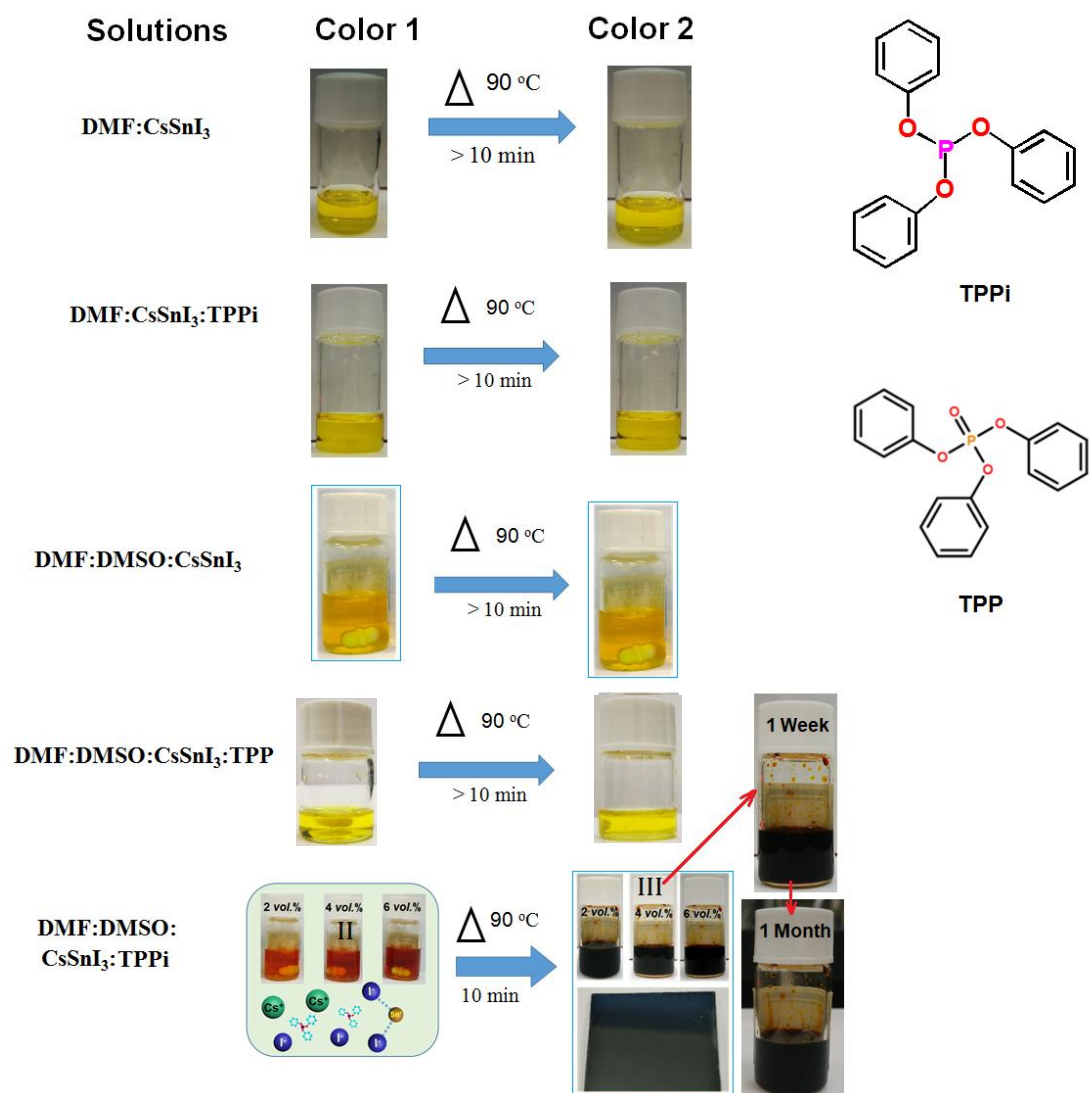

**Fig. S6.** Images of color comparisons of different solutions with parallel processes.

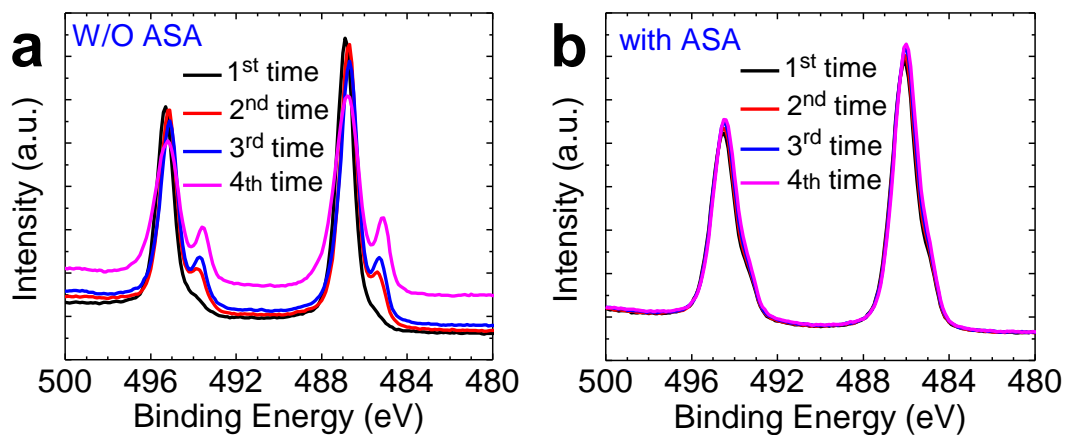

**Figure S7.** XPS spectra of the Sn (3d) bands on the Sn-based perovskite surface with different X-ray irradiation times (30 min each time).

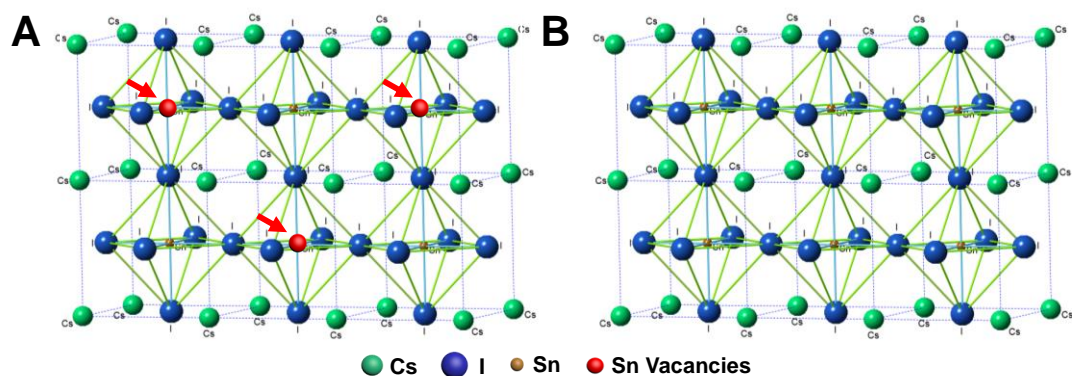

**Fig. S8.** The crystal structure of the  $\text{CsSnI}_3$  film with an orthorhombic ( $Pnam$ ) structure prepared from the solution shown in Figure 1a: (a) the film containing the doping carrier concentration from the  $\text{CsSnI}_3$  solution without TPPi and (b) the film not containing the doping carrier concentration from the  $\text{CsSnI}_3$  solution with TPPi.

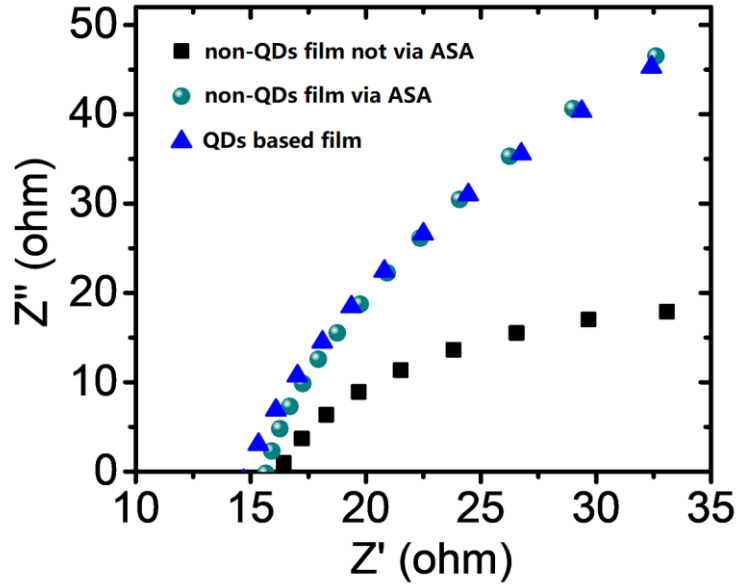

**Fig. S9.** The high frequency part (is associated with  $R_s$ ) of EIS plots for of the ITO/PEDOT:PSS/CsSnI<sub>3</sub> (from different precursor solutions)/PCBM/Ag devices.

**Tab. S1.** The character fitting values of PL decay spectra shown in Figure 5c.

| CsSnI <sub>3</sub> films         | $\tau_1$ (ns) | $\tau_2$ (ns) |
|----------------------------------|---------------|---------------|
| non-QDs film From solution I     | 0.20          | 0.22          |
| non-QDs From solution II         | 0.31          | 0.67          |
| QDs based film From solution III | 1.38          | 7.01          |

**Tab. S2.** The character values of Nyquist plots of the ITO/PEDOT:PSS/CsSnI<sub>3</sub> (from different precursor solutions)/PCBM/Ag devices shown in Figure 5d.

| CsSnI <sub>3</sub> films         | $R_s$ ( $\Omega$ ) | $R_{rec}$ ( $\Omega$ ) |
|----------------------------------|--------------------|------------------------|
| non-QDs film From solution I     | 16.33              | 37.58                  |
| non-QDs From solution II         | 15.66              | 147.88                 |
| QDs based film From solution III | 14.79              | 283.12                 |
